# Supplementary material
Source: PubMed Central journal article supplement (PMC1315836)
Supplement: 4-embor738-s1.pdf [file 4-embor738-s1.pdf]

| Protein                                                               | Function                    | Target residue               | Role of SUMOylation                                                                 | References                                                                                                                                 |
|-----------------------------------------------------------------------|-----------------------------|------------------------------|-------------------------------------------------------------------------------------|--------------------------------------------------------------------------------------------------------------------------------------------|
| p53                                                                   | Tumor suppressor            | K386                         | Modulates p53 transcriptional activity                                              | (Gostissa et al., 1999; Kwek et al., 2001; Mei 2002; Melchior and Hengst, 2002; Muller e Rodriguez et al., 1999; Schmidt and Muller, 2002) |
| P73 $\alpha$                                                          | P53 homologue               | K627                         | Subnuclear relocalization of p73 $\alpha$                                           | (Minty et al., 2000)                                                                                                                       |
| c-Jun                                                                 | Transcriptional activator   | K229                         | Reduces c-Jun transcriptional activity                                              | (Muller et al., 2000; Schmidt and Muller, 2002)                                                                                            |
| AR                                                                    | Transcriptional activator   | K386, 520                    | Reduces AR transcriptional activity                                                 | (Kotaja et al., 2002b; Nishida and Yasuda, 2000 al., 2000)                                                                                 |
| PR                                                                    | Transcriptional activator   | K388                         | Involves in auto-inhibition and transrepression of PR                               | (Abdel-Hafiz et al., 2002)                                                                                                                 |
| GR                                                                    | Transcriptional activator   | K277, 293, 703               | Reduces GR transcriptional activity                                                 | (Le Drean et al., 2002; Tian et al., 2002)                                                                                                 |
| LEF-1                                                                 | Transcriptional activator   | K25, 267                     | Represses LEF-1 activity by sequestration in nuclear dots                           | (Sachdev et al., 2001)                                                                                                                     |
| c-Myb                                                                 | Transcriptional activator   | K499, 523                    | Reduces c-Myb transcriptional activity                                              | (Bies et al., 2002)                                                                                                                        |
| AP-2                                                                  | Transcriptional activator   | K10                          | Reduces AP-2 transcriptional activity                                               | (Eloranta and Hurst, 2002)                                                                                                                 |
| GRIP-1                                                                | Co-activator                | K239, 731, 788               | Activates cooperation with AR                                                       | (Kotaja et al., 2002a)                                                                                                                     |
| Sp3                                                                   | Transcriptional activator   | K108, 539                    | Reduces Sp3 transcriptional activity                                                | (Ross et al., 2002; Sapetschnig et al., 2002)                                                                                              |
| C/EBP $\alpha$<br>C/EBP $\beta$<br>C/EBP $\delta$<br>C/EBP $\epsilon$ | Transcriptional activator   | K159<br>K134<br>K120<br>K121 | Regulates the repression effect of the regulatory domain motif of C/EBP proteins    | (Kim et al., 2002)                                                                                                                         |
| HSF1                                                                  | Heat shock factor           | K298                         | Stimulates DNA binding and heat induced HSF1 activity                               | (Hong et al., 2001)                                                                                                                        |
| HSF2                                                                  | Heat shock factor           | K82                          | Stimulates DNA binding of HSF2                                                      | (Goodson et al., 2001)                                                                                                                     |
| HDAC1                                                                 | Co-repressor                | K444, 476                    | Enhances HDAC activity                                                              | (David et al., 2002)                                                                                                                       |
| HDAC4                                                                 | Co-repressor                | K559                         | Enhances HDAC activity                                                              | (Kirsh et al., 2002)                                                                                                                       |
| TEL                                                                   | Transcriptional repressor   | K99                          | Mediates the localization of TEL to nuclear dots                                    | (Chakrabarti et al., 1999; Chakrabarti et al., 2000)                                                                                       |
| HIPK2                                                                 | Co-repressor                | K1182                        | Mediates the localization of HIPK2 to nuclear dots                                  | (Kim et al., 1999)                                                                                                                         |
| IE2p86                                                                | Viral regulator             | K175, 180                    | Required for transactivation potential of IE2                                       | (Hofmann et al., 2000)                                                                                                                     |
| Ttk69                                                                 | Transcriptional repressor   | unknown                      | unknown                                                                             | (Lehembre et al., 2000)                                                                                                                    |
| Dorsal                                                                | Signal transducer           | K382                         | Activates nuclear import of Dorsal and regulates Dorsal-mediated activation         | (Bhaskar et al., 2002; Bhaskar et al., 2000)                                                                                               |
| I $\kappa$ B $\alpha$                                                 | Signal transducer           | K21                          | Inhibits ubiquitination of I $\kappa$ B $\alpha$ and blocks NF- $\kappa$ B activity | (Desterro et al., 1998)                                                                                                                    |
| PML                                                                   | Tumor suppressor            | K65, 160, 490                | Required for PML nuclear bodies integrity                                           | (Ishov et al., 1999; Muller et al., 1998; Zhong et al., 1999)                                                                              |
| Sp100                                                                 | PML body associated protein | K297                         | Mediates interaction with HP1                                                       | (Seeler et al., 2001; Sternsdorf et al., 1999)                                                                                             |
| TOP1, 2                                                               | DNA repair                  | K117 (TOP1)                  | Induced after DNA damage, involved in nuclear delocalization                        | (Mao et al., 2000a; Mao et al., 2000b; Mo et al., 2000)                                                                                    |
| TDG                                                                   | DNA repair                  | K330                         | Releases of the DNA glycosylase from the abasic sites                               | (Hardeland et al., 2002)                                                                                                                   |
| PCNA                                                                  | DNA repair                  | K127, 164                    | Prevents PCNA ubiquitination and inhibits DNA repair                                | (Hoegge et al., 2002)                                                                                                                      |
| ARNT                                                                  | Transcriptional activator   | K245                         | Modulates ARNT transcriptional activity and inhibits the interaction with PML       | (Tojo et al., 2002)                                                                                                                        |

**Table I.** SUMO targets and SUMOylation functions

AR: Androgen Receptor, PR: Progesterone Receptor, GR: Glucocorticoid Receptor, LEF-1: Leukocyte Enhancer Factor-1, GRIP-1: Glucocorticoid Receptor Interacting Protein-1, C/EBP: CCAAT/Enhancer Binding protein, HSF: Heat Shock Factor, HDAC: Histone DeAcetylase, HIPK2: Homeodomain-Interacting Protein Kinase 2, Ttk: Tramtrack, PML: ProMyelocytic Leukemia, HP1: Heterochromatin Protein 1, TOP: TOPoisomerase, TDG: Thymine DNA Glycosylase, PCNA: Proliferating Cell Nuclear Antigen, ARNT: Aryl hydrocarbon Receptor Nuclear Transporter.

**References.**

- Abdel-Hafiz, H.A., Takimoto, G.S., Tung, L. and Horwitz, K.B. (2002) The inhibitory function (IF) in human progesterone receptor N-terminus binds small ubiquitin-like modifier (SUMO-1) protein to regulate autoinhibition and transrepression. *J Biol Chem*, **277**, 33950-33956.
- Bhaskar, V., Smith, M. and Courey, A.J. (2002) Conjugation of Smt3 to dorsal may potentiate the Drosophila immune response. *Mol Cell Biol*, **22**, 492-504.
- Bhaskar, V., Valentine, S.A. and Courey, A.J. (2000) A functional interaction between dorsal and components of the Smt3 conjugation machinery. *J Biol Chem*, **275**, 4033-4040.
- Bies, J., Markus, J. and Wolff, L. (2002) Covalent attachment of the SUMO-1 protein to the negative regulatory domain of the c-Myc transcription factor modifies its stability and transactivation capacity. *J Biol Chem*, **277**, 8999-9009.
- Chakrabarti, S.R., Sood, R., Ganguly, S., Bohlander, S., Shen, Z. and Nucifora, G. (1999) Modulation of TEL transcription activity by interaction with the ubiquitin-conjugating enzyme UBC9. *Proc Natl Acad Sci U S A*, **96**, 7467-7472.
- Chakrabarti, S.R., Sood, R., Nandi, S. and Nucifora, G. (2000) Posttranslational modification of TEL and TEL/AML1 by SUMO-1 and cyclin D-dependent assembly into nuclear bodies. *Proc. Natl. Acad. Sci. U S A*, **97**, 13281-13285.
- David, G., Neptune, M.A. and DePinho, R.A. (2002) SUMO-1 Modification of Histone Deacetylase 1 (HDAC1) Modulates Its Biologic Activities. *J Biol Chem*, **277**, 23658-23663.
- Desterro, J.M., Rodriguez, M.S. and Hay, R.T. (1998) SUMO-1 modification of I $\kappa$ B $\alpha$  inhibits NF- $\kappa$ B activation. *Mol Cell*, **2**, 23-29.

- Eloranta, J.J. and Hurst, H.C. (2002) Transcription factor AP-2 interacts with the SUMO-conjugating enzyme UBC9 and is sumoylated in vivo *Biol Chem*, **277**, 30798-30804.
- Goodson, M.L., Hong, Y., Rogers, R., Matunis, M.J., Park-Sarge, O.K. and Sarge, K.D. (2001) Sumo-1 modification regulates the DNA binding activity of heat shock transcription factor 2, a promyelocytic leukemia nuclear body associated transcription factor. *J Biol Chem*, **276**, 18513-18518.
- Gostissa, M., Hengstermann, A., Fogal, V., Sandy, P., Schwarz, S.E., Scheffner, M. and Del Sal, G. (1999) Activation of p53 by conjugation to the ubiquitin-like protein SUMO-1. *Embo J*, **18**, 6462-6471.
- Hardeland, U., Steinacher, R., Jiricny, J. and Schar, P. (2002) Modification of the human thymine-DNA glycosylase by ubiquitin-like protein facilitates enzymatic turnover. *Embo J*, **21**, 1456-1464.
- Hoege, C., Pfander, B., Moldovan, G.L., Pyrowolakis, G. and Jentsch, S. (2002) RAD6-dependent DNA repair is linked to modification of PCNA by ubiquitin and SUMO. *Nature*, **419**, 135-141.
- Hofmann, H., Floss, S. and Stamminger, T. (2000) Covalent modification of the transactivator protein IE2-p86 of human cytomegalovirus by conjugation to the ubiquitin-homologous proteins SUMO-1 and hSMT3b. *J Virol*, **74**, 2510-2524.
- Hong, Y., Rogers, R., Matunis, M.J., Mayhew, C.N., Goodson, M., Park-Sarge, O.K. and Sarge, K.D. (2001) Regulation of heat shock transcription factor 1 by stress-induced SUMO-1 modification. *J Biol Chem*, **276**, 40263-40267.
- Ishov, A.M., Sotnikov, A.G., Negorev, D., Vladimirova, O.V., Neff, N., Kamitani, T., Yeh, E.T., Strauss, J.F., 3rd and Maul, G.G. (1999) PML is critical for ND10 formation and recruits the PML-interacting protein daxx to this nuclear structure when modified by SUMO-1. *J Cell Biol*, **147**, 221-234.
- Kim, J., Cantwell, C.A., Johnson, P.F., Pfarr, C.M. and Williams, S.C. (2002) Transcriptional activity of CCAAT/enhancer binding proteins is controlled by a conserved inhibitory domain that is a target for sumoylation. *J Biol Chem*, **277**, 38037-38044.
- Kim, Y.H., Choi, C.Y. and Kim, Y. (1999) Covalent modification of the homeodomain-interacting protein kinase 2 (HIPK2) by the ubiquitin-like protein SUMO-1. *Proc Natl Acad Sci U S A*, **96**, 12350-12355.
- Kirsh, O., Seeler, J.S., Pichler, A., Gast, A., Muller, S., Miska, E., Mathieu, M., Harel-Bellan, A., Kouzarides, T., Melchior, F. and Dejean, F. (2002) The SUMO E3 ligase RanBP2 promotes modification of the HDAC4 deacetylase. *Embo J*, **21**, 2682-2691.
- Kotaja, N., Karvonen, U., Janne, O.A. and Palvimo, J.J. (2002a) The nuclear receptor interaction domain of GRIP1 is modulated by covalent attachment of SUMO-1. *J Biol Chem*, **277**, 30283-30288.
- Kotaja, N., Karvonen, U., Janne, O.A. and Palvimo, J.J. (2002b) PIAS proteins modulate transcription factors by functioning as SUMO E3 ligases. *Mol Cell Biol*, **22**, 5222-5234.
- Kwek, S.S., Derry, J., Tyner, A.L., Shen, Z. and Gudkov, A.V. (2001) Functional analysis and intracellular localization of p53 modified by SUMO-1. *Oncogene*, **20**, 2587-2599.
- Le Drean, Y., Mincheneau, N., Le Goff, P. and Michel, D. (2002) Potentiation of glucocorticoid receptor transcriptional activity by sumoylation. *Endocrinology*, **143**, 3482-3489.

- Lehembre, F., Badenhorst, P., Muller, S., Travers, A., Schweisguth, F. and Dejean, A. (2000) Covalent modification of the transcription repressor tramtrack by the ubiquitin-related protein Smt3 in *Drosophila* flies. *Mol Cell Biol*, **20**, 1072-1082.
- Mao, Y., Desai, S.D. and Liu, L.F. (2000a) SUMO-1 conjugation to human DNA topoisomerase II isozymes. *J Biol Chem*, **275**, 26066-26073.
- Mao, Y., Sun, M., Desai, S.D. and Liu, L.F. (2000b) SUMO-1 conjugation to topoisomerase I: A possible repair response to topoisomerase mediated DNA damage. *Proc Natl Acad Sci U S A*, **97**, 4046-4051.
- Megidish, T., Xu, J.H. and Xu, C.W. (2002) Activation of p53 by protein inhibitor of activated Stat1 (PIAS1). *J Biol Chem*, **277**, 8255-8259.
- Melchior, F. and Hengst, L. (2002) SUMO-1 and p53. *Cell Cycle*, **1**, 245-249.
- Minty, A., Dumont, X., Kaghad, M. and Caput, D. (2000) Covalent modification of p73alpha by SUMO-1. Two-hybrid screening with p73 identifies novel SUMO-1-interacting proteins and a SUMO-1 interaction motif. *J Biol Chem*, **275**, 36316-36323.
- Mo, Y.Y., Yu, Y., Shen, Z. and Beck, W.T. (2002) Nucleolar delocalization of human topoisomerase I in response to topotecan correlates with sumoylation of the protein. *J Biol Chem*, **277**, 2958-2964.
- Muller, S., Berger, M., Lehembre, F., Seeler, J.S., Haupt, Y. and Dejean, A. (2000) c-Jun and p53 activity is modulated by SUMO modification. *J Biol Chem*, **275**, 13321-13329.
- Muller, S., Matunis, M.J. and Dejean, A. (1998) Conjugation with the ubiquitin-related modifier SUMO-1 regulates the partitioning of p73 within the nucleus. *Embo J*, **17**, 61-70.
- Nishida, T. and Yasuda, H. (2002) PIAS1 and PIASx function as SUMO-E3 ligases toward androgen receptor, and repress androgen receptor dependent transcription. *J Biol Chem*, **277**, 41311-41317.
- Poukka, H., Karvonen, U., Janne, O.A. and Palvimo, J.J. (2000) Covalent modification of the androgen receptor by small ubiquitin-like modifier 1 (SUMO-1). *Proc Natl Acad Sci U S A*, **97**, 14145-14150.
- Rodriguez, M.S., Desterro, J.M., Lain, S., Midgley, C.A., Lane, D.P. and Hay, R.T. (1999) SUMO-1 modification activates the transcription response of p53. *Embo J*, **18**, 6455-6461.
- Ross, S., Best, J.L., Zon, L.I. and Gill, G. (2002) SUMO-1 modification represses Sp3 transcriptional activation and modulates its subnuclear localization. *Mol. Cell*, **10**, 831-842.
- Sachdev, S., Bruhn, L., Sieber, H., Pichler, A., Melchior, F. and Grosschedl, R. (2001) PIASy, a nuclear matrix-associated SUMO E3 ligase represses LEF1 activity by sequestration into nuclear bodies. *Genes Dev*, **15**, 3088-3103.
- Sapetschnig, A., Rischitor, G., Braun, H., Doll, A., Schergaut, M., Melchior, F. and Suske, G. (2002) Transcription factor Sp3 is silenced through SUMO modification by PIAS1. *Embo J*, **21**, 5206-5215.
- Schmidt, D. and Muller, S. (2002) Members of the PIAS family act as SUMO ligases for c-Jun and p53 and repress p53 activity. *Proc Natl Acad Sci U S A*, **99**, 2872-2877.
- Seeler, J.S., Marchio, A., Losson, R., Desterro, J.M., Hay, R.T., Chambon, P. and Dejean, A. (2001) Common properties of nuclear body proteins SP100 and TIF1alpha chromatin factor: role of SUMO modification. *Mol Cell Biol*, **21**, 3314-3324.
- Sternsdorf, T., Jensen, K., Reich, B. and Will, H. (1999) The nuclear dot protein sp100, characterization of domains necessary for dimerization, subcellular localization, and modification by small ubiquitin-like modifiers. *J Biol Chem*, **274**, 12555-12566.

- Tian, S., Poukka, H., Palvimo, J.J. and Janne, O.A. (2002) SUMO-1 modification of the glucocorticoid receptor. *Biochem J*, **367**, 907-911.
- Tojo, M., Matsuzaki, K., Minami, T., Honda, Y., Yasuda, H., Chiba, T., Saya, H., Fujii-Kuriyama, Y. and Nakao, M. (2002) The Ah hydrocarbon receptor nuclear transporter is modulated by the SUMO-1 conjugating system. *J Biol Chem*, **277**, 46576-46585.
- Zhong, S., Muller, S., Ronchetti, S., Freemont, P.S., Dejean, A. and Pandolfi, P.P. (2000) Role of SUMO-1-modified PML in nuclear body formation. *Blood*, **95**, 2748-2752.
